# Supplementary material for: Structure of Ljungan virus provides insight into genome packaging of this picornavirus
Source: PubMed Central journal article supplement (PMC4633645; doi:10.1038/ncomms9316), 2015-10-08
Supplement: ncomms9316-s1.pdf [file ncomms9316-s1.pdf]

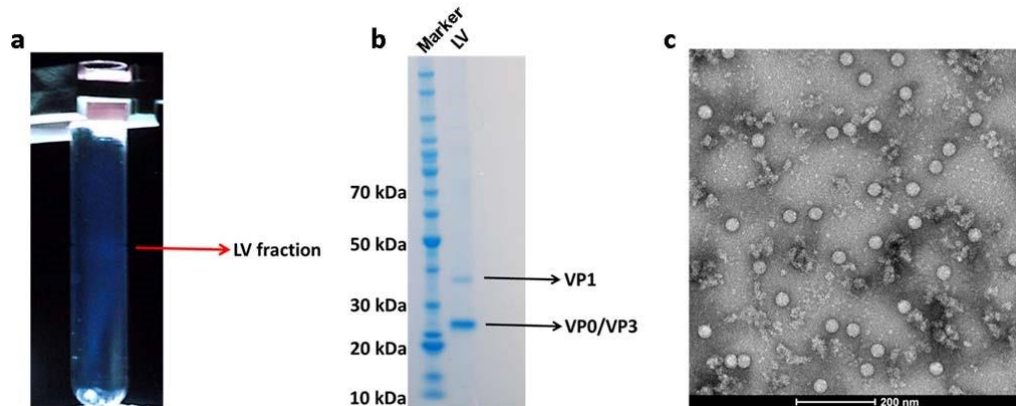

**Supplementary Figure 1 | LV purification and characterization.** (a) Zonal ultracentrifugation of a 15% to 40% sucrose density gradient for the purification of LV, as described in Methods. Only one predominant particle type was observed and the  $\lambda_{260}/\lambda_{280}$  absorbance ratio was 1.66, indicating that the LV particles contain the RNA genome. (b) SDS-PAGE for viral protein composition analysis using a NuPAGE 4-12% Bis-Tris Gel (Invitrogen). The calculated molecular weights of VP0, VP1 and VP3 were 28.2 kDa, 27.7 kDa, 33.1 kDa respectively. (c) Negative stain electron microscopy of LV particles.

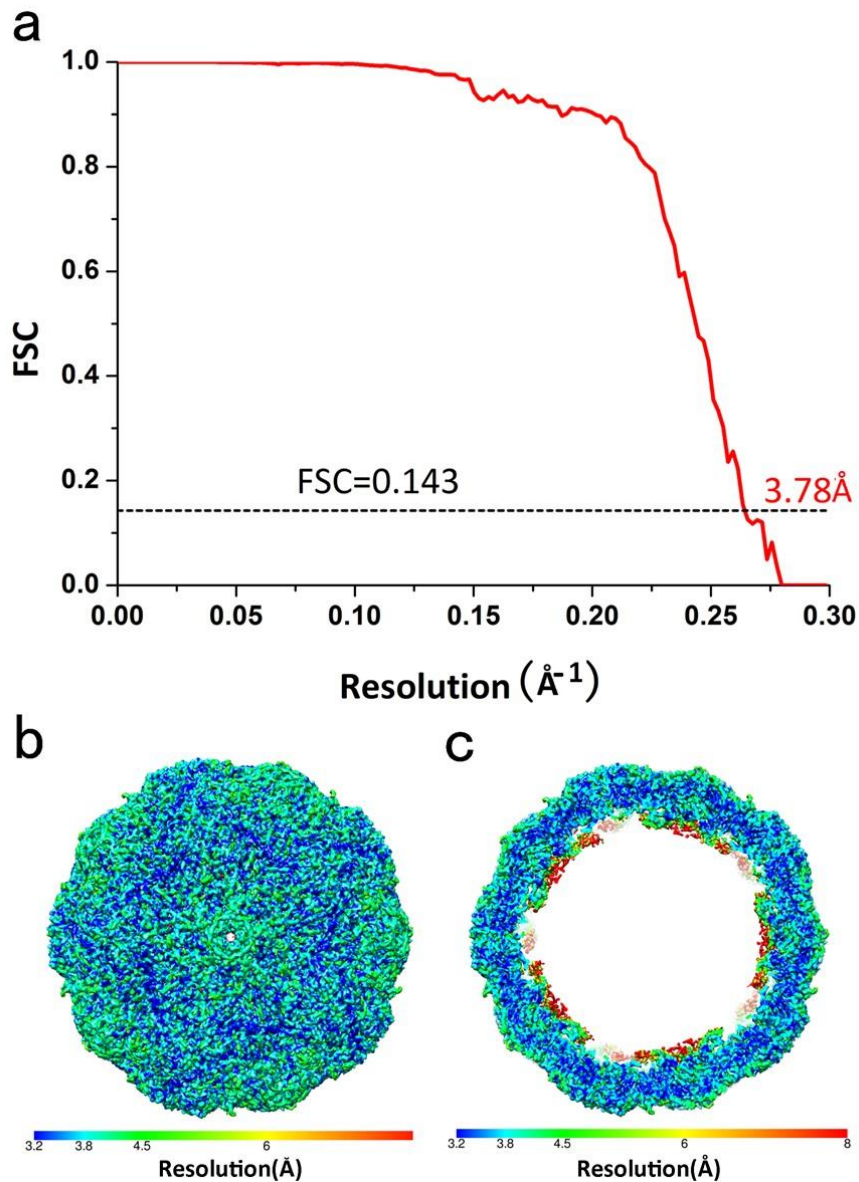

**Supplementary Figure 2 | Resolution evaluation of Cryo-EM map of LV.** (a) The gold-standard FSC curves of the final maps. The resolution at FSC=0.143 is 3.78 Å. (b) and (c) The final LV map was analyzed by ResMap<sup>1</sup> showing a resolution distribution from 3.2 to 8 Å. Core parts of the map have resolution of ~3.2 Å, the resolution of the interior parts of the map (corresponding to RNA density) is ~7-8 Å.

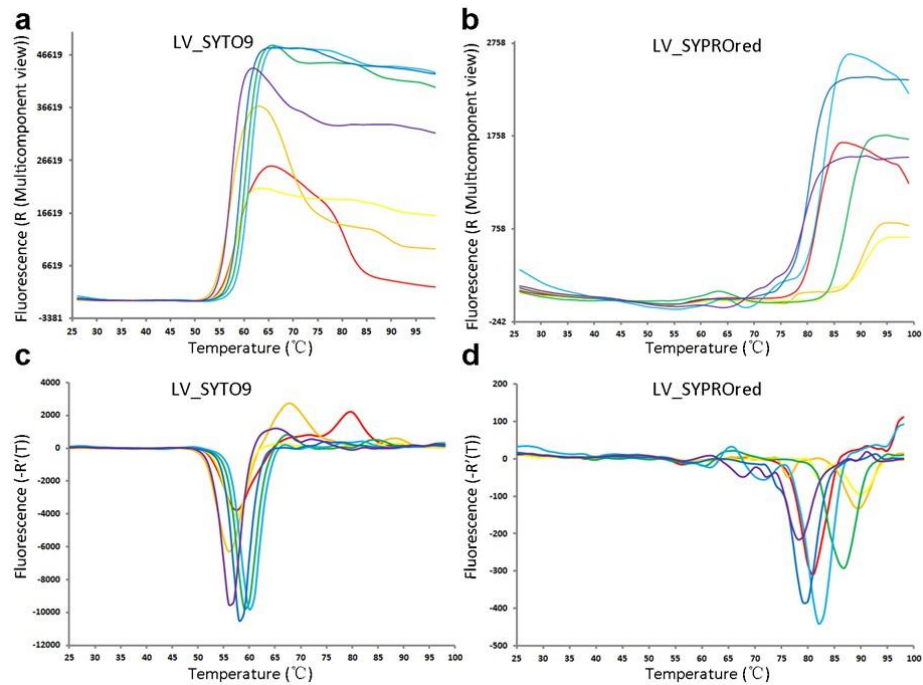

**Supplementary Figure 3 | Thermal stability of LV particles.** The stability of LV particles across the pH range from 4.0 to 10.0 was characterized by differential scanning fluorimetry assays using dyes SYTO9 and SYPRO RED to detect RNA exposure and protein melting, respectively. (a) The raw fluorescence traces of LV particles incubated with SYTO9 and (b) with SYPROred; their first derivatives are shown in (c) and (d), respectively. The colour scheme is red (pH 4.0), orange (pH 5.0), yellow (pH 6.0), green (pH 7.0), sky blue (pH 8.0), blue (pH 9.0) and purple (pH 10.0).

VP1

LV

LV . . . GLHSWGSEMDELVDLSDLNPEIQDNEEITQTQNVAAQGEAAATEVGLRATENDGSLSEQLNMSQPM. . . FLNFK. KH  
HAV VGDDSGGFSITVSTEQNVDPDPQVGIITMKDLKGGKARRGKMDVSGVQAPVGAITITIEDPVLAK. . . KVPET. . . FP. . . EL. KP  
PV2 . . . . . GLGDLEIGVVEGVTRNALTEITPANLPDQTSSGPAHSKETPALITAVETGAT. . . NEPLVPSDITVQ. TRHVI  
HRV14 . . . . . GLGDELEEVIIEKTKQTVASISSGPKHTQKVPILITANETGAT. . . MEVLVPSDSIE. TRTTY  
FMDV . . . . . TTTGESADP. . . VITTVEN. YG. GD. TQ

LV

LV KVN. . IYAATHKVDHIFGRAWAVGVFNTE. . . . . TAAIQKFDLHF. . . . . PTS<sup>\*</sup>THGALSRLF<sup>\*</sup>CFH  
HAV GES. . RHTSDHMSLYKFMGRSHFLCTFTFN. S. . . . . NNKEYTFPITLSSTSNPPHGLPS<sup>\*</sup>TLRWFFNL<sup>\*</sup>QL  
PV2 QKRTR. . . SETV<sup>\*</sup>ESFFAR<sup>\*</sup>RGACVAIEVDND. . . . . SKLFSVWKITYK. . . . . DTVQLRRKLEFF<sup>\*</sup>TY  
HRV14 MHFNG. . . SETVECFLGR<sup>\*</sup>AACVHVTEIQNKDATGIDNHREAKL. FNDWKINLS. . . . . SLVQLRKKLEFF<sup>\*</sup>TY  
FMDV V. QRR. . . HHTV<sup>\*</sup>GFIMDR<sup>\*</sup>FKV<sup>\*</sup>INSL. . . . . SPTHVIDLM. . . . . QTHKHGIVGALLRA<sup>\*</sup>ATY

LV

LV WTGELN<sup>\*</sup>IH<sup>\*</sup>IL<sup>\*</sup>INVST. . . . . TNAFLK<sup>\*</sup>V<sup>\*</sup>AHTWF<sup>\*</sup>G<sup>\*</sup>TDSGI. . . . . ARTA<sup>\*</sup>LE<sup>\*</sup>SN<sup>\*</sup>G<sup>\*</sup>TM<sup>\*</sup>IIPN. . . EQMT<sup>\*</sup>LC<sup>\*</sup>VP<sup>\*</sup>YSE  
HAV YRGPLD<sup>\*</sup>LT<sup>\*</sup>II<sup>\*</sup>ITGA. . . . . TDVDGMAW<sup>\*</sup>FPV<sup>\*</sup>GLAVDTPWVEKESALSIDYK<sup>\*</sup>TAL<sup>\*</sup>GAV<sup>\*</sup>RFNTRRTGNIO<sup>\*</sup>IR<sup>\*</sup>LP<sup>\*</sup>WYSY  
PV2 SRFDME<sup>\*</sup>FTF<sup>\*</sup>V<sup>\*</sup>TSNYTDANNHALNQVYQ<sup>\*</sup>IMYIP<sup>\*</sup>GA. . . . . PIPKWN<sup>\*</sup>DTW<sup>\*</sup>Q<sup>\*</sup>TS<sup>\*</sup>NP<sup>\*</sup>S<sup>\*</sup>F<sup>\*</sup>YTYG. APPAR<sup>\*</sup>IS<sup>\*</sup>VP<sup>\*</sup>VGI  
HRV14 VRFDS<sup>\*</sup>EY<sup>\*</sup>TL<sup>\*</sup>LATASQPPDSANY. SSNLVVQ<sup>\*</sup>AMYVPP<sup>\*</sup>GA. . . . . PNPKEWDDY<sup>\*</sup>TW<sup>\*</sup>Q<sup>\*</sup>SA<sup>\*</sup>NP<sup>\*</sup>S<sup>\*</sup>FFKVG. . . DTSR<sup>\*</sup>FS<sup>\*</sup>VP<sup>\*</sup>VGL  
FMDV YFS<sup>\*</sup>DLE<sup>\*</sup>IV<sup>\*</sup>V. R. . . . . HDGNL<sup>\*</sup>TV<sup>\*</sup>VPNGA<sup>\*</sup>PE. . . . . AALS<sup>\*</sup>NT<sup>\*</sup>SN<sup>\*</sup>PTA<sup>\*</sup>Y<sup>\*</sup>NK. . . . . APFTR<sup>\*</sup>AL<sup>\*</sup>VP<sup>\*</sup>TAP

LV

LV VPL<sup>\*</sup>LR<sup>\*</sup>CVK<sup>\*</sup>G. . . . . SDRNSAGL<sup>\*</sup>GLF<sup>\*</sup>TQA<sup>\*</sup>V<sup>\*</sup>GRT. . . . . ISN<sup>\*</sup>R<sup>\*</sup>VQ<sup>\*</sup>IF<sup>\*</sup>V<sup>\*</sup>S<sup>\*</sup>FR<sup>\*</sup>C. PNF<sup>\*</sup>F<sup>\*</sup>P<sup>\*</sup>PA  
HAV LYAV<sup>\*</sup>SGALD. . . . . GLGDKT<sup>\*</sup>STF<sup>\*</sup>GLVSIQ<sup>\*</sup>IANYN. . . HSDEYLS<sup>\*</sup>S<sup>\*</sup>CY<sup>\*</sup>LSV<sup>\*</sup>TEQSEF<sup>\*</sup>Y<sup>\*</sup>FP<sup>\*</sup>RAP  
PV2 ANAYS<sup>\*</sup>HFY<sup>\*</sup>D<sup>\*</sup>GFAK<sup>\*</sup>VPLAQASTEGDS. . . . . LYGAAS<sup>\*</sup>LND<sup>\*</sup>F<sup>\*</sup>GS. LAVR<sup>\*</sup>V<sup>\*</sup>VNDHNPTKLT<sup>\*</sup>SK<sup>\*</sup>IR<sup>\*</sup>VY<sup>\*</sup>MK<sup>\*</sup>PH. VRVW<sup>\*</sup>CP<sup>\*</sup>RPP  
HRV14 ASAY<sup>\*</sup>NCFY<sup>\*</sup>D<sup>\*</sup>GYSHDDA<sup>\*</sup>ETQ. . . . . YGITV<sup>\*</sup>LNHM<sup>\*</sup>GS. MAFR<sup>\*</sup>I<sup>\*</sup>VNEHDEHKTLV<sup>\*</sup>K<sup>\*</sup>IR<sup>\*</sup>VY<sup>\*</sup>HRA<sup>\*</sup>KH. VEAW<sup>\*</sup>IP<sup>\*</sup>RAP  
FMDV H<sup>\*</sup>RV<sup>\*</sup>LATVY<sup>\*</sup>D<sup>\*</sup>GTNKYSASDSRSGLGSIARVATQLPASFN<sup>\*</sup>YCA. IQAQ. . . . . AIH<sup>\*</sup>. ELLV<sup>\*</sup>RM<sup>\*</sup>KR. AEL<sup>\*</sup>Y<sup>\*</sup>CP<sup>\*</sup>RPL

LV

LV PREATSASILERVDEANAELEAVLEARTPDAPLRLKFNPEDEPLKQLREAAKAHFNIMHSD<sup>\*</sup>E  
HAV LNSNAMLSTESMMSR. . . . .  
PV2 RAVPYYPGVGDYKDG<sup>\*</sup>LAPLP<sup>\*</sup>GKGLTTY. . . . .  
HRV14 RALPYTSIGRTNYPK<sup>\*</sup>NT<sup>\*</sup>EP<sup>\*</sup>V<sup>\*</sup>IK<sup>\*</sup>RRK<sup>\*</sup>GDIKSY. . . . .  
FMDV LAIKVTSQDRYKQKI<sup>\*</sup>IAPAK<sup>\*</sup>QLS. . . . .

VPO

LV

LV . . . . . MAA<sup>\*</sup>SKMNPVGNLLST<sup>\*</sup>V<sup>\*</sup>SST<sup>\*</sup>FGSL<sup>\*</sup>L<sup>\*</sup>Q  
HAV . . . . . MMSRQ<sup>\*</sup>GLF<sup>\*</sup>TV<sup>\*</sup>GSGLD<sup>\*</sup>H<sup>\*</sup>ILSLA  
PV2 . . . . . MGAQVSSQKVG<sup>\*</sup>GAHEMSNRAYGGS<sup>\*</sup>TIN<sup>\*</sup>Y<sup>\*</sup>TTIN<sup>\*</sup>Y<sup>\*</sup>RDSASNAASK<sup>\*</sup>QDPAQ<sup>\*</sup>DSK<sup>\*</sup>FT<sup>\*</sup>EP<sup>\*</sup>IK<sup>\*</sup>DV<sup>\*</sup>L<sup>\*</sup>TKT<sup>\*</sup>AP  
HRV14 . . . . . MGAQVSTQKSGSHEHQNLITNGSNQ<sup>\*</sup>TFT<sup>\*</sup>V<sup>\*</sup>IN<sup>\*</sup>Y<sup>\*</sup>YKDAASTSSAG<sup>\*</sup>QSLMSMD<sup>\*</sup>PSK<sup>\*</sup>FT<sup>\*</sup>EP<sup>\*</sup>W<sup>\*</sup>KDL<sup>\*</sup>M<sup>\*</sup>KG<sup>\*</sup>AP  
FMDV GAGQSSPATGSQ<sup>\*</sup>NSGNTGS<sup>\*</sup>I<sup>\*</sup>NNY<sup>\*</sup>MQ<sup>\*</sup>QY<sup>\*</sup>QNSM<sup>\*</sup>TQLGDN<sup>\*</sup>TI<sup>\*</sup>SSGGS<sup>\*</sup>NEGSD<sup>\*</sup>T<sup>\*</sup>TT<sup>\*</sup>STH<sup>\*</sup>INT<sup>\*</sup>Q<sup>\*</sup>ND<sup>\*</sup>W<sup>\*</sup>FSK<sup>\*</sup>LASS<sup>\*</sup>FT<sup>\*</sup>GL<sup>\*</sup>AP

LV

LV NP<sup>\*</sup>SVEEKEMSDRVAASIT<sup>\*</sup>TAG<sup>\*</sup>N<sup>\*</sup>LVQ<sup>\*</sup>ASVAP<sup>\*</sup>TM<sup>\*</sup>VP<sup>\*</sup>KP<sup>\*</sup>DFKNT<sup>\*</sup>D<sup>\*</sup>FLMSYRST. . . TAP<sup>\*</sup>T<sup>\*</sup>NP<sup>\*</sup>K<sup>\*</sup>MVH<sup>\*</sup>LA<sup>\*</sup>HGT<sup>\*</sup>WT<sup>\*</sup>T<sup>\*</sup>NQH  
HAV D<sup>\*</sup>IEE<sup>\*</sup>EQMIQ<sup>\*</sup>SVDRTAVT<sup>\*</sup>GAS<sup>\*</sup>Y<sup>\*</sup>FT<sup>\*</sup>S<sup>\*</sup>VDO<sup>\*</sup>SS<sup>\*</sup>VHTAEV. . . G. SHQIE<sup>\*</sup>PLK<sup>\*</sup>TSVD<sup>\*</sup>KP. . . GSKKT<sup>\*</sup>Q<sup>\*</sup>GE<sup>\*</sup>K<sup>\*</sup>FF<sup>\*</sup>LI<sup>\*</sup>HSAR<sup>\*</sup>WL<sup>\*</sup>T<sup>\*</sup>THA  
PV2 T<sup>\*</sup>LN<sup>\*</sup>SPNIEACGYSV. RVMQL<sup>\*</sup>TLG<sup>\*</sup>NST<sup>\*</sup>IT<sup>\*</sup>TQEAANSVVA<sup>\*</sup>YGRW<sup>\*</sup>PEY<sup>\*</sup>IKDSEAN<sup>\*</sup>PVDQ<sup>\*</sup>TEP<sup>\*</sup>DVAAC<sup>\*</sup>RF<sup>\*</sup>Y<sup>\*</sup>TL<sup>\*</sup>DTVT<sup>\*</sup>WR<sup>\*</sup>KES. . .  
HRV14 A<sup>\*</sup>LN<sup>\*</sup>SPNIEACGYS<sup>\*</sup>D. RVQ<sup>\*</sup>QI<sup>\*</sup>TLG<sup>\*</sup>NST<sup>\*</sup>IT<sup>\*</sup>TQEAANAV<sup>\*</sup>CYAEW<sup>\*</sup>PEY<sup>\*</sup>LPVDV<sup>\*</sup>ASDV<sup>\*</sup>NK<sup>\*</sup>TSK<sup>\*</sup>PD<sup>\*</sup>TSV<sup>\*</sup>CR<sup>\*</sup>F<sup>\*</sup>Y<sup>\*</sup>TL<sup>\*</sup>DSKT<sup>\*</sup>WT<sup>\*</sup>T<sup>\*</sup>GS. . .  
FMDV G<sup>\*</sup>ALL<sup>\*</sup>AD<sup>\*</sup>DKTEET<sup>\*</sup>LLED<sup>\*</sup>RLL<sup>\*</sup>TR<sup>\*</sup>NGH<sup>\*</sup>IT<sup>\*</sup>TQSSVGV<sup>\*</sup>TYGYST<sup>\*</sup>EDHVAG<sup>\*</sup>PNTSGLE<sup>\*</sup>TRV<sup>\*</sup>VQAE<sup>\*</sup>RF<sup>\*</sup>K<sup>\*</sup>KL<sup>\*</sup>FLD<sup>\*</sup>WT<sup>\*</sup>TD<sup>\*</sup>KP

LV

LV RQALVASIT<sup>\*</sup>LQ<sup>\*</sup>AFWPNQDF<sup>\*</sup>. AWGQ<sup>\*</sup>SR<sup>\*</sup>VFAAV<sup>\*</sup>RC<sup>\*</sup>G<sup>\*</sup>H<sup>\*</sup>I<sup>\*</sup>Q<sup>\*</sup>V<sup>\*</sup>Q<sup>\*</sup>LN<sup>\*</sup>V<sup>\*</sup>IGSA<sup>\*</sup>G<sup>\*</sup>CI<sup>\*</sup>AA<sup>\*</sup>Y<sup>\*</sup>MP<sup>\*</sup>K<sup>\*</sup>TTHDH. . . . .  
HAV LFHEVAKLD<sup>\*</sup>VK<sup>\*</sup>LLY. NEQFA. VQGL<sup>\*</sup>LR<sup>\*</sup>VH<sup>\*</sup>TYAR<sup>\*</sup>FC<sup>\*</sup>HE<sup>\*</sup>I<sup>\*</sup>Q<sup>\*</sup>VO<sup>\*</sup>IN<sup>\*</sup>TP<sup>\*</sup>FQ<sup>\*</sup>GG<sup>\*</sup>ICAM<sup>\*</sup>VP<sup>\*</sup>GDQS. . . . .  
PV2 . . . RGW<sup>\*</sup>WMK<sup>\*</sup>LPD<sup>\*</sup>ALK. D. MGLF<sup>\*</sup>GQ<sup>\*</sup>MF<sup>\*</sup>VH<sup>\*</sup>YLG<sup>\*</sup>RA<sup>\*</sup>G<sup>\*</sup>IT<sup>\*</sup>VH<sup>\*</sup>VOC<sup>\*</sup>NASK<sup>\*</sup>PH<sup>\*</sup>GAL<sup>\*</sup>GVFAV<sup>\*</sup>PEMCLAGD<sup>\*</sup>STH<sup>\*</sup>MFT<sup>\*</sup>KYENANP  
HRV14 . . . KGWCW<sup>\*</sup>LPD<sup>\*</sup>ALK. D. MGV<sup>\*</sup>FGQ<sup>\*</sup>MF<sup>\*</sup>FHSLGR<sup>\*</sup>SG<sup>\*</sup>IT<sup>\*</sup>VH<sup>\*</sup>VOC<sup>\*</sup>NAT<sup>\*</sup>K<sup>\*</sup>PH<sup>\*</sup>SG<sup>\*</sup>GL<sup>\*</sup>LV<sup>\*</sup>V<sup>\*</sup>VI<sup>\*</sup>PEHQLASHEG<sup>\*</sup>S. . . . . NVS  
FMDV FG. YLTKLE<sup>\*</sup>LP. D. . . . . DHH. G<sup>\*</sup>VFGHL<sup>\*</sup>VD<sup>\*</sup>SYAY<sup>\*</sup>RN<sup>\*</sup>G<sup>\*</sup>HD<sup>\*</sup>LV<sup>\*</sup>SAV<sup>\*</sup>Q<sup>\*</sup>ENG<sup>\*</sup>GC<sup>\*</sup>LV<sup>\*</sup>AM<sup>\*</sup>VP<sup>\*</sup>EWKA. . . . .

LV

LV . . . . . MNTYTFG<sup>\*</sup>SY<sup>\*</sup>TN<sup>\*</sup>LP<sup>\*</sup>H<sup>\*</sup>V<sup>\*</sup>LN<sup>\*</sup>NAAT<sup>\*</sup>TS<sup>\*</sup>Q<sup>\*</sup>RD<sup>\*</sup>LY<sup>\*</sup>T<sup>\*</sup>PY<sup>\*</sup>V<sup>\*</sup>F<sup>\*</sup>NHNYART. DS. DDLG  
HAV GEKGGEFKGSFTLD<sup>\*</sup>TNAT<sup>\*</sup>NPARN<sup>\*</sup>FC<sup>\*</sup>PVDY<sup>\*</sup>LF<sup>\*</sup>GS<sup>\*</sup>. VLAG<sup>\*</sup>NA<sup>\*</sup>F<sup>\*</sup>V<sup>\*</sup>Y<sup>\*</sup>PH<sup>\*</sup>Q<sup>\*</sup>I<sup>\*</sup>NL<sup>\*</sup>R<sup>\*</sup>T<sup>\*</sup>NN<sup>\*</sup>C<sup>\*</sup>AT<sup>\*</sup>LV<sup>\*</sup>PY<sup>\*</sup>V<sup>\*</sup>NSLSIDSM. TK. HNNV  
PV2 VKY<sup>\*</sup>TF<sup>\*</sup>TH<sup>\*</sup>PGER<sup>\*</sup>GIDLSSANEVGG<sup>\*</sup>PK<sup>\*</sup>VD<sup>\*</sup>LV<sup>\*</sup>LN<sup>\*</sup>MNG. TLLG<sup>\*</sup>N<sup>\*</sup>LL<sup>\*</sup>IP<sup>\*</sup>PH<sup>\*</sup>Q<sup>\*</sup>F<sup>\*</sup>IN<sup>\*</sup>LR<sup>\*</sup>T<sup>\*</sup>NN<sup>\*</sup>C<sup>\*</sup>AT<sup>\*</sup>LV<sup>\*</sup>PY<sup>\*</sup>INS<sup>\*</sup>VPIDSM. TR. HNNV  
HRV14 . . . . . FDTREKY<sup>\*</sup>Q<sup>\*</sup>IT<sup>\*</sup>LP<sup>\*</sup>PH<sup>\*</sup>Q<sup>\*</sup>F<sup>\*</sup>IS<sup>\*</sup>PR<sup>\*</sup>T<sup>\*</sup>NM<sup>\*</sup>T<sup>\*</sup>HT<sup>\*</sup>IT<sup>\*</sup>W<sup>\*</sup>PY<sup>\*</sup>LV<sup>\*</sup>GNRYDQY. KK. HKPV

LV

LV GT<sup>\*</sup>Y<sup>\*</sup>LV<sup>\*</sup>WWSA<sup>\*</sup>RT<sup>\*</sup>VP<sup>\*</sup>SGSP<sup>\*</sup>TT<sup>\*</sup>VD<sup>\*</sup>V<sup>\*</sup>TF<sup>\*</sup>FGSL<sup>\*</sup>LDL<sup>\*</sup>DF<sup>\*</sup>Q<sup>\*</sup>CP<sup>\*</sup>RP<sup>\*</sup>PGAD<sup>\*</sup>VI<sup>\*</sup>YT<sup>\*</sup>Q  
HAV E<sup>\*</sup>LT<sup>\*</sup>IR<sup>\*</sup>VWSE<sup>\*</sup>DN<sup>\*</sup>IG<sup>\*</sup>T<sup>\*</sup>SAY<sup>\*</sup>TSL<sup>\*</sup>NV<sup>\*</sup>LAR<sup>\*</sup>FTDL<sup>\*</sup>ELH<sup>\*</sup>GL<sup>\*</sup>TPL. . . S. . . TQ  
PV2 G<sup>\*</sup>I<sup>\*</sup>AL<sup>\*</sup>LP<sup>\*</sup>LAP<sup>\*</sup>DFAT<sup>\*</sup>ESSTE<sup>\*</sup>IP<sup>\*</sup>IT<sup>\*</sup>LT<sup>\*</sup>I<sup>\*</sup>AP<sup>\*</sup>MCC<sup>\*</sup>E<sup>\*</sup>FN<sup>\*</sup>GL<sup>\*</sup>RN<sup>\*</sup>ITV. . . PR<sup>\*</sup>TQ  
HRV14 S<sup>\*</sup>LM<sup>\*</sup>VIP<sup>\*</sup>IAP<sup>\*</sup>RT<sup>\*</sup>VP<sup>\*</sup>T<sup>\*</sup>GAT<sup>\*</sup>PS<sup>\*</sup>LP<sup>\*</sup>IT<sup>\*</sup>VT<sup>\*</sup>I<sup>\*</sup>AP<sup>\*</sup>MCT<sup>\*</sup>E<sup>\*</sup>FS<sup>\*</sup>G<sup>\*</sup>IR<sup>\*</sup>SKS<sup>\*</sup>I. . . . . VP<sup>\*</sup>Q  
FMDV T<sup>\*</sup>LV<sup>\*</sup>MV<sup>\*</sup>LSP<sup>\*</sup>RT<sup>\*</sup>VS<sup>\*</sup>N<sup>\*</sup>TAA<sup>\*</sup>PQ<sup>\*</sup>IK<sup>\*</sup>VYAN<sup>\*</sup>L<sup>\*</sup>AP<sup>\*</sup>TYV<sup>\*</sup>HVA<sup>\*</sup>GEL<sup>\*</sup>PSKE. . . . .



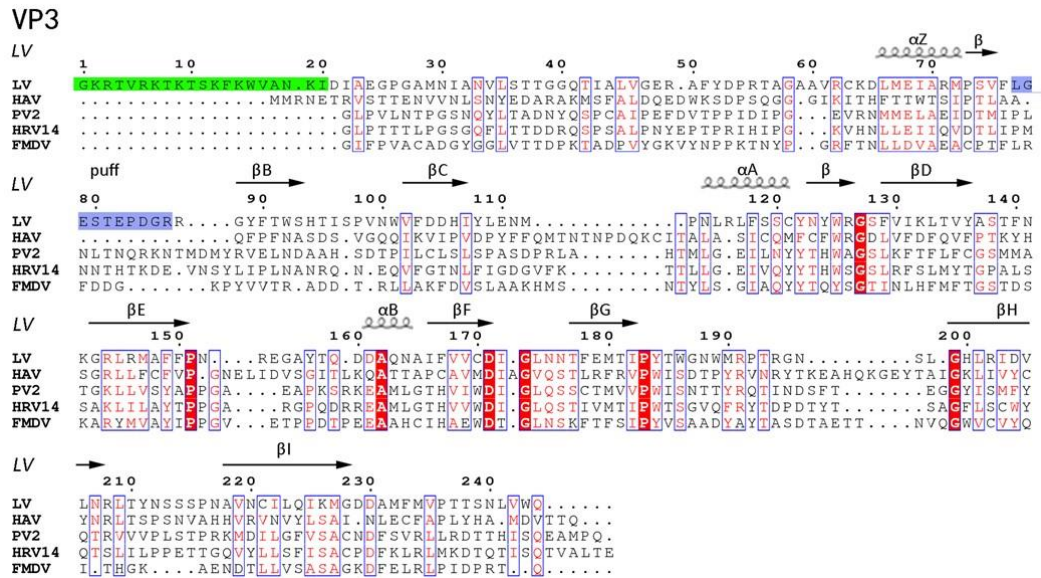

**Supplementary Figure 4 | Structure-based sequence alignment.** Esript<sup>2</sup> representation of a structure-based sequence alignment of VP1, VP0 and VP3 of the LV particle with representative picornaviruses, including hepatitis A virus (HAV), poliovirus type 2 (PV2), human rhinovirus 14 (HRV14) and foot-and-mouth disease virus (FMDV) (PDB codes: 4QPI, 1EAH<sup>3</sup>, 4RHV<sup>4</sup> and 1ZBA<sup>5</sup> respectively). The secondary structural elements for LV are shown, also above the sequences are symbols which show features described in the text. The unique extension of VP1 C-terminus in LV is highlighted in red. An approximately 20 amino acids extension enriched with basic residues to the N terminus of VP3 in parechovirus is highlighted in green. VP4 sequences of HAV, PV2, HRV14 and FMDV are shown in yellow. A puff configuration in VP3 of LV is represented in blue. The blue stars represent the cell adapted mutations. The residue numbers are for LV.

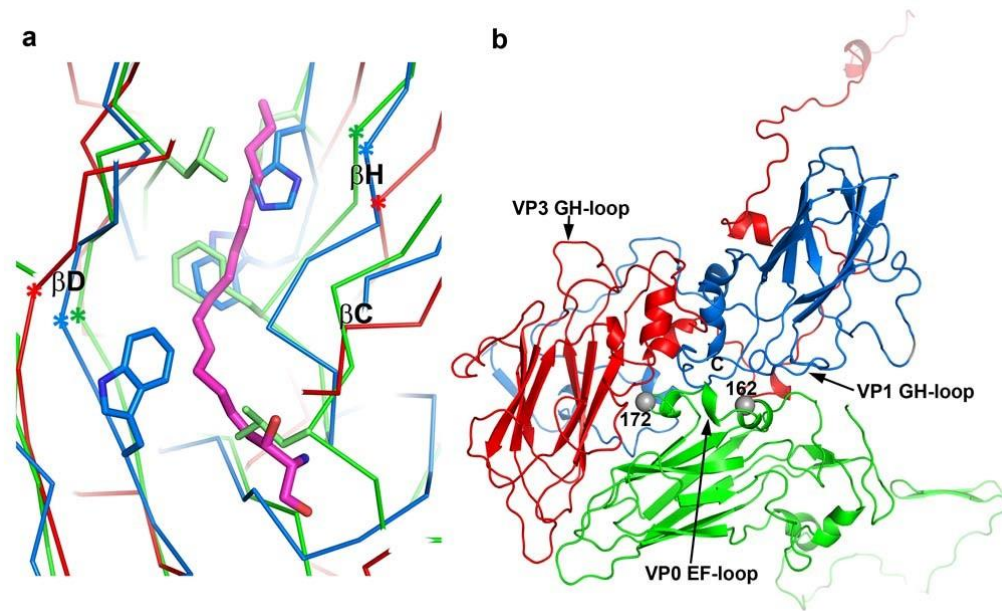

**Supplementary Figure 5 | Pocket analysis and cell adapted mutations. (a)**

Close-up view of LV (blue) and HAV (green) compared with VP1 pocket factor binding region of EV71 (red; pocket factor, magenta), note the shift of strand C and strand H and occlusion of pocket entrance. Bulky side chains occlude the HAV and LV pocket. (b) Ribbon diagram of LV protomer with cell adapted mutations (residues 162 and 172) in VP0 EF-loop shown as grey spheres. The third mutation Y289H at VP1 C-terminal region is not built in the model due to the lower resolution electron density map. VP1, VP0 and VP3 are coloured in blue, green and red, respectively.

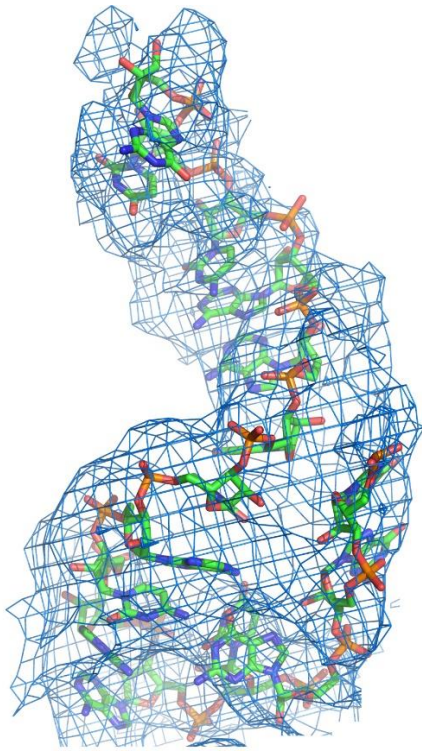

**Supplementary Figure 6 | Close-up view of electron density for the ordered RNA.** The map is contoured at  $3\sigma$  and the resolution is 7-8 Å (Supplementary Fig. 2). The nucleotide sequence is arbitrary.

## Supplementary References

1. Kucukelbir, A., Sigworth, F.J. & Tagare, H.D. Quantifying the local resolution of cryo-EM density maps. *Nat Methods* **11**, 63-5 (2014).
2. Gouet, P., Courcelle, E., Stuart, D.I. & Metz, F. ESPript: analysis of multiple sequence alignments in PostScript. *Bioinformatics* **15**, 305-8 (1999).
3. Lentz, K.N. et al. Structure of poliovirus type 2 Lansing complexed with antiviral agent SCH48973: comparison of the structural and biological properties of three poliovirus serotypes. *Structure* **5**, 961-78 (1997).
4. Arnold, E. & Rossmann, M.G. The Use of Molecular-Replacement Phases for the Refinement of the Human Rhinovirus-14 Structure. *Acta Crystallographica Section A* **44**, 270-282 (1988).
5. Fry, E.E. et al. Structure of Foot-and-mouth disease virus serotype A10 61 alone and complexed with oligosaccharide receptor: receptor conservation in the face of antigenic variation. *J Gen Virol* **86**, 1909-20 (2005).
